# Supplementary material for: Anthropogenic point-source and non-point-source nitrogen inputs into Huai River basin and their impacts on riverine ammonia–nitrogen flux
Source: Copernicus journal article supplement (doi:10.5194/bg-12-4275-2015), 2015-07-22
Supplement: Supplementary file 1 [file bg-12-4275-2015-supplement.pdf]

Supplement of Biogeosciences, 12, 4275–4289, 2015  
<http://www.biogeosciences.net/12/4275/2015/>  
doi:10.5194/bg-12-4275-2015-supplement  
© Author(s) 2015. CC Attribution 3.0 License.

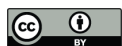

*Supplement of*

## **Anthropogenic point-source and non-point-source nitrogen inputs into Huai River basin and their impacts on riverine ammonia–nitrogen flux**

**W. S. Zhang et al.**

*Correspondence to:* X. Y. Li (xyli@rcees.ac.cn)

The copyright of individual parts of the supplement might differ from the CC-BY 3.0 licence.

## Part I Watershed characteristics

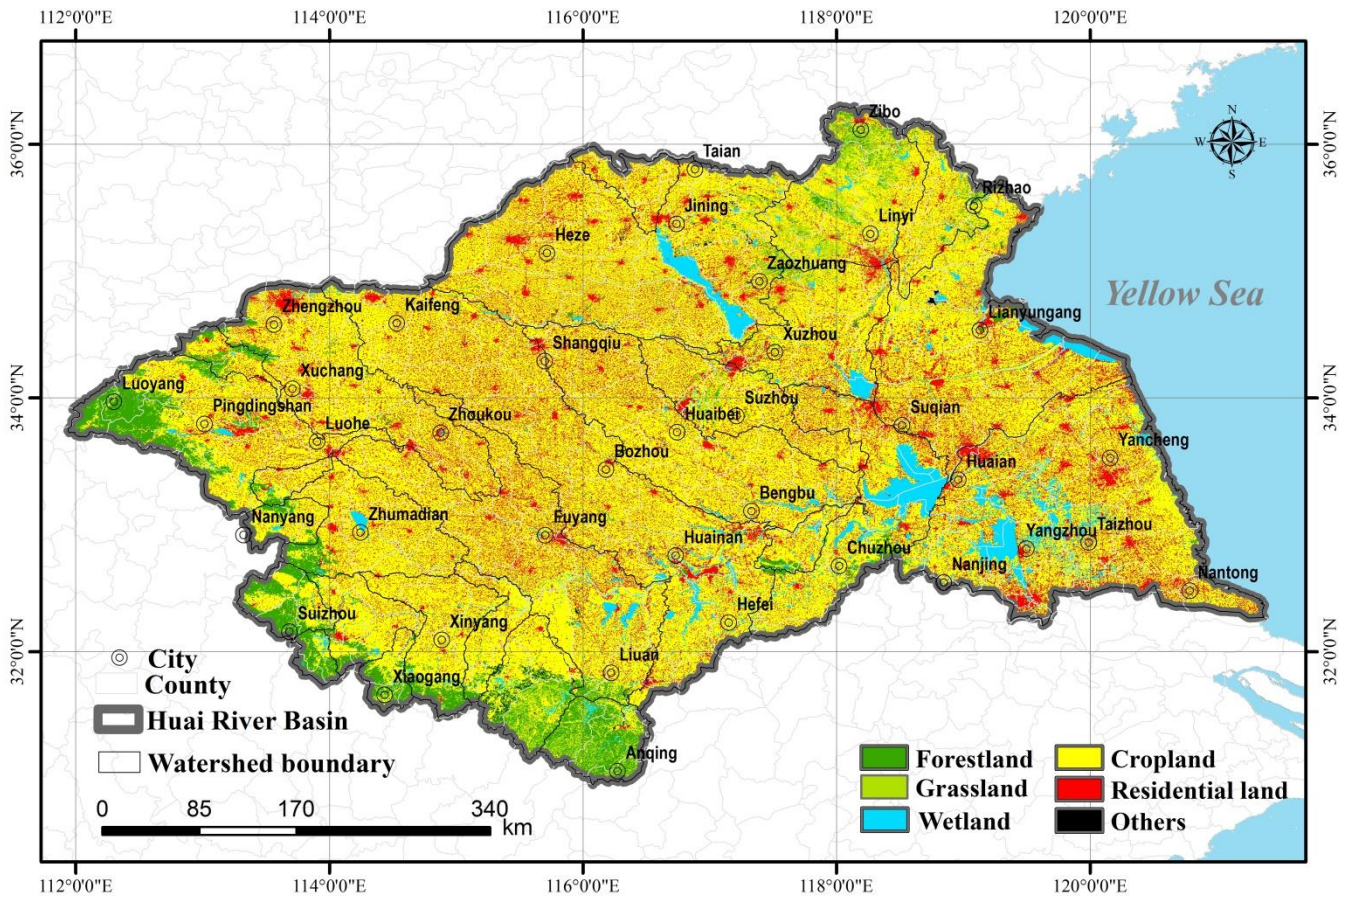

**Fig. 1A** Distribution of land use types in Huai River Basin (30m ×30m resolution)

**Table 1A Basic characteristics of 27 watersheds in Huai River Basin (HRB)**

| Watershed ID | Area (km <sup>2</sup> ) | Cropland (%) | Forest (%) | Wetland (%) | Residential land (%) | Precipitation (mm) | Temperature (°C) | Slope (%) | Population density (km <sup>-2</sup> ) |
|--------------|-------------------------|--------------|------------|-------------|----------------------|--------------------|------------------|-----------|----------------------------------------|
| 1            | 3,042                   | 41.31        | 53.60      | 2.12        | 1.90                 | 1,090              | 15.88            | 5.60      | 236.24                                 |
| 2            | 1,095                   | 22.46        | 70.50      | 6.28        | 0.29                 | 1,127              | 16.30            | 10.10     | 144.44                                 |
| 3            | 1,686                   | 46.49        | 47.92      | 1.73        | 2.25                 | 1,171              | 16.45            | 6.26      | 266.14                                 |
| 4            | 9,770                   | 64.41        | 45.96      | 3.55        | 5.70                 | 1,100              | 15.98            | 4.57      | 310.01                                 |
| 5            | 15,771                  | 60.67        | 29.13      | 2.78        | 6.55                 | 1,123              | 16.09            | 4.48      | 350.80                                 |
| 6            | 30,201                  | 67.42        | 20.18      | 2.63        | 9.14                 | 1,081              | 15.79            | 3.19      | 455.01                                 |
| 7            | 11,534                  | 73.57        | 10.75      | 2.46        | 12.81                | 1,003              | 15.38            | 1.98      | 583.58                                 |
| 8            | 1,914                   | 68.96        | 23.38      | 2.02        | 5.45                 | 982                | 15.36            | 4.27      | 367.65                                 |
| 9            | 1,308                   | 70.55        | 14.81      | 1.42        | 12.98                | 962                | 15.20            | 3.00      | 635.44                                 |
| 10           | 13,867                  | 57.11        | 26.77      | 1.67        | 10.36                | 826                | 14.84            | 5.36      | 597.05                                 |
| 11           | 1,753                   | 50.99        | 27.44      | 0.88        | 9.37                 | 720                | 14.75            | 6.64      | 595.20                                 |
| 12           | 29,375                  | 65.13        | 15.80      | 1.44        | 14.30                | 802                | 14.90            | 3.47      | 773.17                                 |
| 13           | 89,674                  | 64.25        | 18.48      | 2.63        | 12.07                | 1,033              | 15.52            | 3.61      | 611.28                                 |
| 14           | 5,625                   | 49.91        | 38.83      | 2.39        | 2.91                 | 1,461              | 16.29            | 8.70      | 325.29                                 |
| 15           | 4,349                   | 16.49        | 67.68      | 2.66        | 0.78                 | 1,642              | 16.59            | 13.64     | 150.93                                 |
| 16           | 121,817                 | 67.12        | 13.91      | 3.11        | 13.67                | 1,006              | 15.49            | 2.82      | 640.65                                 |
| 17           | 123,861                 | 67.08        | 13.85      | 3.25        | 13.64                | 1,006              | 15.50            | 2.80      | 636.78                                 |
| 18           | 16,981                  | 77.74        | 0.35       | 3.26        | 17.73                | 945                | 15.32            | 0.59      | 608.62                                 |
| 19           | 7,126                   | 71.40        | 2.20       | 2.28        | 18.04                | 949                | 15.17            | 1.40      | 718.01                                 |
| 20           | 160,460                 | 67.82        | 11.19      | 4.53        | 14.33                | 1,000              | 15.49            | 2.38      | 616.78                                 |
| 21           | 2,577                   | 77.58        | 2.03       | 1.36        | 16.13                | 761                | 13.59            | 0.71      | 788.45                                 |
| 22           | 31,708                  | 70.99        | 2.63       | 5.58        | 16.89                | 818                | 14.13            | 1.16      | 738.07                                 |
| 23           | 10,566                  | 57.31        | 11.35      | 2.92        | 8.31                 | 873                | 13.71            | 5.67      | 507.47                                 |
| 24           | 4,585                   | 74.89        | 8.19       | 2.98        | 9.62                 | 864                | 13.67            | 2.67      | 582.95                                 |
| 25           | 52,023                  | 67.73        | 4.48       | 5.25        | 15.09                | 854                | 14.14            | 2.12      | 706.05                                 |
| 26           | 21,467                  | 68.47        | 2.17       | 7.63        | 18.76                | 988                | 14.40            | 1.09      | 607.20                                 |
| 27           | 30,312                  | 62.77        | 0.64       | 14.76       | 20.23                | 1,050              | 15.47            | 0.54      | 532.95                                 |
| HRB          | 268,846                 | 68.72        | 9.81       | 6.06        | 13.49                | 973                | 15.10            | 2.00      | 623.26                                 |

## Part II Calculation of $\text{NANI}_n$

### 2.1 Fertilizer N ( $N_{chem}$ )

**Table 2A Data used to calculate fertilizer N**

| Watershed ID | Single N fertilizer<br>(metric ton N yr <sup>-1</sup> ) | Compound fertilizer*<br>(metric ton yr <sup>-1</sup> ) | $N_{chem}$ (kg N km <sup>-2</sup> yr <sup>-1</sup> ) |
|--------------|---------------------------------------------------------|--------------------------------------------------------|------------------------------------------------------|
| 1            | 23,761                                                  | 5,780                                                  | 8,477                                                |
| 2            | 3,491                                                   | 650                                                    | 3,397                                                |
| 3            | 9,235                                                   | 2,084                                                  | 5,908                                                |
| 4            | 76,919                                                  | 36,451                                                 | 9,179                                                |
| 5            | 152,548                                                 | 71,298                                                 | 11,255                                               |
| 6            | 342,361                                                 | 296,002                                                | 14,766                                               |
| 7            | 134,026                                                 | 208,843                                                | 17,957                                               |
| 8            | 19,165                                                  | 20,498                                                 | 13,759                                               |
| 9            | 19,132                                                  | 26,402                                                 | 21,697                                               |
| 10           | 173,483                                                 | 159,339                                                | 16,532                                               |
| 11           | 10,699                                                  | 17,582                                                 | 9,612                                                |
| 12           | 460,324                                                 | 341,956                                                | 19,745                                               |
| 13           | 1,108,964                                               | 886,781                                                | 15,828                                               |
| 14           | 38,261                                                  | 14,200                                                 | 7,686                                                |
| 15           | 6,645                                                   | 6,683                                                  | 2,066                                                |
| 16           | 1,624,618                                               | 1,257,525                                              | 16,950                                               |
| 17           | 1,647,838                                               | 1,281,490                                              | 16,925                                               |
| 18           | 251,212                                                 | 267,585                                                | 20,309                                               |
| 19           | 94,579                                                  | 84,286                                                 | 17,412                                               |
| 20           | 2,138,062                                               | 1,736,144                                              | 17,111                                               |
| 21           | 47,013                                                  | 33,570                                                 | 22,803                                               |
| 22           | 561,600                                                 | 456,553                                                | 22,751                                               |
| 23           | 70,743                                                  | 86,362                                                 | 9,556                                                |
| 24           | 47,400                                                  | 66,397                                                 | 15,407                                               |
| 25           | 848,566                                                 | 670,567                                                | 20,823                                               |
| 26           | 431,913                                                 | 195,881                                                | 23,314                                               |
| 27           | 547,242                                                 | 218,842                                                | 20,581                                               |
| HRB          | 4,013,184                                               | 2,887,832                                              | 18,687                                               |

\* Compound fertilizer is assumed to contain 35% N by weight. To calculate  $N_{chem}$ , we take the sum of the single N fertilizer value and 0.35 x compound fertilizer value and divide by watershed area.

## 2.2 Biological nitrogen fixation ( $N_{fix}$ )

**Table 3A Data used to calculate biological N fixation**

| Watershed ID | Peanuts   | Soybeans  | Paddy<br>(ha) | Upland    | $N_{fix}$<br>(kg N km <sup>-2</sup> yr <sup>-1</sup> ) |
|--------------|-----------|-----------|---------------|-----------|--------------------------------------------------------|
| 1            | 13,436    | 3,986     | 31,311        | 18,877    | 1,095                                                  |
| 2            | 1,316     | 364       | 7,820         | 765       | 411                                                    |
| 3            | 3,254     | 1,317     | 27,917        | 3,777     | 853                                                    |
| 4            | 52,496    | 11,249    | 150,148       | 77,544    | 1,381                                                  |
| 5            | 96,016    | 21,383    | 317,168       | 144,625   | 1,653                                                  |
| 6            | 218,197   | 66,032    | 424,577       | 788,190   | 1,951                                                  |
| 7            | 113,497   | 39,548    | 17,472        | 621,969   | 2,447                                                  |
| 8            | 12,856    | 7,295     | 1,206         | 73,746    | 1,824                                                  |
| 9            | 4,708     | 4,381     | 411           | 64,737    | 1,535                                                  |
| 10           | 54,080    | 42,941    | 3,219         | 521,806   | 1,369                                                  |
| 11           | 3,601     | 5,559     | 2             | 66,385    | 1,135                                                  |
| 12           | 150,570   | 117,277   | 15,298        | 1,395,871 | 1,769                                                  |
| 13           | 415,071   | 376,433   | 799,439       | 2,968,838 | 1,760                                                  |
| 14           | 7,086     | 4,890     | 95,540        | 11,208    | 784                                                    |
| 15           | 649       | 1,672     | 24,999        | 7,224     | 253                                                    |
| 16           | 565,695   | 671,569   | 1,087,820     | 4,422,085 | 1,936                                                  |
| 17           | 573,669   | 684,288   | 1,123,742     | 4,468,617 | 1,937                                                  |
| 18           | 96,097    | 250,333   | 66,805        | 910,389   | 3,059                                                  |
| 19           | 28,041    | 91,556    | 32,972        | 295,603   | 2,495                                                  |
| 20           | 735,598   | 1,068,811 | 1,421,409     | 5,942,017 | 2,047                                                  |
| 21           | 21,582    | 10,371    | 21,137        | 100,969   | 2,295                                                  |
| 22           | 198,354   | 78,386    | 110,234       | 1,205,158 | 1,715                                                  |
| 23           | 81,090    | 10,258    | 27,201        | 282,888   | 1,558                                                  |
| 24           | 52,918    | 7,162     | 17,841        | 157,188   | 2,264                                                  |
| 25           | 318,003   | 119,428   | 250,302       | 1,829,949 | 1,677                                                  |
| 26           | 100,750   | 47,875    | 388,546       | 576,671   | 1,762                                                  |
| 27           | 18,111    | 96,416    | 843,331       | 424,446   | 1,426                                                  |
| HRB          | 1,225,380 | 1,339,692 | 2,921,429     | 8,930,272 | 1,900                                                  |

## 2.3 Atmospheric N deposition ( $N_{dep}$ )

**Table 4A Data used to calculate atmospheric N deposition**

| Watershed ID | $NO_y$<br>(metric tons N) | $N_{dep}$<br>(kg N km <sup>2</sup> yr <sup>-1</sup> ) |
|--------------|---------------------------|-------------------------------------------------------|
| 1            | 3,434.12                  | 1,129                                                 |
| 2            | 703.98                    | 643                                                   |
| 3            | 1,803.86                  | 1,070                                                 |
| 4            | 13,343.97                 | 1,366                                                 |
| 5            | 28,712.84                 | 1,821                                                 |
| 6            | 110,998.08                | 3,675                                                 |
| 7            | 68,734.58                 | 5,959                                                 |
| 8            | 7,026.62                  | 3,670                                                 |
| 9            | 15,753.73                 | 12,047                                                |
| 10           | 101,157.90                | 7,295                                                 |
| 11           | 10,000.56                 | 5,704                                                 |
| 12           | 227,528.89                | 7,746                                                 |
| 13           | 454,445.23                | 5,068                                                 |
| 14           | 8,455.65                  | 1,503                                                 |
| 15           | 4,088.36                  | 940                                                   |
| 16           | 629,446.48                | 5,167                                                 |
| 17           | 635,032.03                | 5,127                                                 |
| 18           | 66,490.21                 | 3,916                                                 |
| 19           | 46,341.14                 | 6,503                                                 |
| 20           | 774,292.88                | 4,825                                                 |
| 21           | 23,921.20                 | 9,283                                                 |
| 22           | 328,422.81                | 10,358                                                |
| 23           | 28,514.66                 | 2,699                                                 |
| 24           | 13,634.75                 | 2,974                                                 |
| 25           | 428,236.43                | 8,232                                                 |
| 26           | 89,399.69                 | 4,165                                                 |
| 27           | 167,771.24                | 5,535                                                 |
| HRB          | 1,473,334.99              | 5,480                                                 |

## 2.4 Net food and feed import in rural area ( $N_{r-im}$ )

**Table 5A Data used to calculate food and feed N**

| Watershed ID | Paddy    | Wheat    | Potatoes | Corn     | Peanut  | Soybean | Cabbage   | Fruits  |
|--------------|----------|----------|----------|----------|---------|---------|-----------|---------|
|              |          |          |          |          |         |         |           |         |
| 1            | 178.1    | 91.4     | 8.3      | 16.0     | 44.8    | 5.2     | 295.1     | 12.9    |
| 2            | 42.2     | 13.4     | 1.6      | 3.0      | 5.1     | 0.7     | 79.2      | 1.2     |
| 3            | 233.8    | 40.9     | 5.7      | 0.4      | 8.7     | 2.4     | 167.6     | 3.5     |
| 4            | 981.7    | 466.2    | 30.0     | 82.9     | 158.0   | 17.2    | 1,197.0   | 29.2    |
| 5            | 1,886.5  | 1,099.5  | 51.4     | 157.2    | 277.6   | 31.7    | 2,013.7   | 50.0    |
| 6            | 2,507.0  | 4,046.8  | 130.8    | 1,397.5  | 620.0   | 92.9    | 5,456.4   | 137.4   |
| 7            | 80.1     | 2,686.9  | 63.7     | 1,211.1  | 319.1   | 55.4    | 2,968.3   | 72.9    |
| 8            | 8.1      | 278.6    | 14.3     | 123.3    | 33.2    | 9.6     | 206.3     | 14.5    |
| 9            | 0.0      | 298.5    | 8.1      | 207.8    | 16.0    | 6.4     | 415.8     | 8.7     |
| 10           | 12.0     | 1,821.0  | 299.0    | 1,118.2  | 174.4   | 80.4    | 4,249.8   | 156.3   |
| 11           | 0.0      | 177.1    | 47.7     | 125.3    | 7.2     | 9.3     | 243.9     | 24.2    |
| 12           | 28.7     | 5,442.4  | 544.6    | 2,833.8  | 519.6   | 213.7   | 12,709.0  | 604.8   |
| 13           | 4,958.1  | 13,366.9 | 897.1    | 5,497.4  | 1,261.1 | 587.2   | 25,532.2  | 954.6   |
| 14           | 665.5    | 98.2     | 12.7     | 14.2     | 21.7    | 8.2     | 641.8     | 22.0    |
| 15           | 144.5    | 9.3      | 5.2      | 8.7      | 1.6     | 3.3     | 101.0     | 0.9     |
| 16           | 6,838.8  | 20,095.2 | 1,201.7  | 7,453.6  | 1,770.5 | 1,035.8 | 40,626.7  | 1,826.2 |
| 17           | 7,089.6  | 20,300.0 | 1,212.9  | 7,487.5  | 1,792.4 | 1,050.2 | 40,977.3  | 1,841.6 |
| 18           | 420.1    | 3,822.0  | 200.8    | 1,407.8  | 350.9   | 367.4   | 7,325.7   | 1,282.6 |
| 19           | 148.1    | 1,184.8  | 105.2    | 500.2    | 87.9    | 129.7   | 2,485.5   | 605.4   |
| 20           | 9,025.2  | 26,410.5 | 1,629.0  | 9,681.1  | 2,329.6 | 1,614.6 | 53,156.6  | 3,806.9 |
| 21           | 18.9     | 578.2    | 20.1     | 418.6    | 96.6    | 26.5    | 2,136.7   | 66.0    |
| 22           | 592.3    | 5,824.2  | 395.6    | 3,459.6  | 743.7   | 188.7   | 24,889.7  | 2,114.7 |
| 23           | 111.7    | 573.8    | 334.0    | 582.1    | 297.8   | 24.5    | 2,923.3   | 1,678.9 |
| 24           | 122.3    | 427.8    | 151.7    | 332.7    | 224.9   | 19.5    | 1,288.8   | 222.1   |
| 25           | 1,354.8  | 7,668.7  | 830.3    | 4,724.0  | 1,175.7 | 279.4   | 35,820.1  | 4,154.4 |
| 26           | 2,951.7  | 2,508.3  | 255.7    | 694.8    | 388.5   | 106.4   | 7,865.0   | 432.6   |
| 27           | 5,510.2  | 3,028.6  | 91.3     | 533.0    | 53.8    | 284.7   | 10,822.1  | 380.0   |
| HRB          | 18,964.2 | 40,044.0 | 2,958.0  | 15,965.7 | 4,172.5 | 2,304.5 | 108,952.5 | 8,996.0 |

**Table 5A (continued):**

| Watershed ID | Rural population              | Horses & cattle | Hogs & pigs | Sheep & lambs | Chickens & ducks                          |             |            |           |            |        |
|--------------|-------------------------------|-----------------|-------------|---------------|-------------------------------------------|-------------|------------|-----------|------------|--------|
|              |                               |                 |             |               | $N_{selfo}$                               | $N_{selje}$ | $N_{harv}$ | $N_{liv}$ | $N_{r-im}$ |        |
|              | (10 <sup>4</sup> individuals) |                 |             |               | (kg N km <sup>-2</sup> yr <sup>-1</sup> ) |             |            |           |            |        |
| 1            | 55.1                          | 12.5            | 30.9        | 14.4          | 395.8                                     | 781         | 3,932      | 1,963     | 1,086      | 1,665  |
| 2            | 11.7                          | 1.3             | 5.9         | 1.6           | 79.1                                      | 462         | 1,571      | 1,041     | 515        | 476    |
| 3            | 38.5                          | 5.6             | 19.9        | 3.7           | 297.8                                     | 986         | 3,749      | 2,539     | 1,188      | 1,009  |
| 4            | 238.0                         | 37.7            | 150.5       | 41.1          | 1,680.2                                   | 1,051       | 4,534      | 2,919     | 1,419      | 1,246  |
| 5            | 462.8                         | 66.5            | 275.1       | 70.3          | 3,254.9                                   | 1,266       | 5,085      | 3,618     | 1,618      | 1,114  |
| 6            | 1,169.0                       | 209.4           | 822.3       | 340.3         | 8,909.4                                   | 1,670       | 8,256      | 5,113     | 2,540      | 2,273  |
| 7            | 577.4                         | 122.4           | 489.4       | 241.1         | 4,493.5                                   | 2,160       | 12,707     | 7,262     | 3,843      | 3,761  |
| 8            | 61.9                          | 29.8            | 48.3        | 33.5          | 467.9                                     | 1,396       | 12,418     | 4,502     | 2,925      | 6,387  |
| 9            | 68.5                          | 7.1             | 78.0        | 29.5          | 716.4                                     | 2,261       | 12,848     | 7,729     | 4,755      | 2,626  |
| 10           | 649.4                         | 130.6           | 396.8       | 224.7         | 3,836.9                                   | 2,020       | 9,844      | 4,956     | 2,779      | 4,130  |
| 11           | 88.8                          | 8.9             | 39.9        | 29.1          | 485.7                                     | 2,186       | 7,089      | 3,641     | 2,221      | 3,413  |
| 12           | 1,681.9                       | 256.9           | 973.3       | 535.2         | 11,018.4                                  | 2,470       | 10,516     | 6,680     | 3,191      | 3,115  |
| 13           | 4,421.3                       | 586.8           | 2,370.3     | 1,182.4       | 26,957.5                                  | 2,127       | 8,105      | 5,638     | 2,507      | 2,087  |
| 14           | 162.8                         | 12.2            | 56.5        | 31.1          | 1,406.4                                   | 1,249       | 3,462      | 2,227     | 1,212      | 1,272  |
| 15           | 58.2                          | 2.5             | 14.2        | 2.2           | 120.9                                     | 578         | 792        | 575       | 265        | 529    |
| 16           | 6,266.3                       | 784.4           | 3,212.4     | 1,869.6       | 37,546.4                                  | 2,219       | 8,200      | 6,189     | 2,537      | 1,694  |
| 17           | 6,333.8                       | 791.4           | 3,236.1     | 1,879.2       | 37,890.8                                  | 2,206       | 8,129      | 6,162     | 2,515      | 1,658  |
| 18           | 887.4                         | 105.4           | 369.5       | 387.3         | 5,826.8                                   | 2,255       | 8,114      | 8,412     | 2,437      | -480   |
| 19           | 374.7                         | 20.8            | 152.3       | 167.9         | 2,006.9                                   | 2,268       | 6,281      | 6,572     | 2,103      | -126   |
| 20           | 7,979.9                       | 935.1           | 3,911.7     | 2,531.1       | 48,315.5                                  | 2,145       | 7,670      | 6,265     | 2,387      | 1,163  |
| 21           | 168.4                         | 18.6            | 76.8        | 79.0          | 1,397.5                                   | 2,820       | 10,721     | 10,005    | 3,398      | 138    |
| 22           | 1,906.6                       | 142.3           | 784.9       | 1,396.9       | 16,008.3                                  | 2,594       | 9,439      | 8,090     | 3,045      | 898    |
| 23           | 440.2                         | 20.0            | 142.9       | 168.5         | 3,099.7                                   | 1,797       | 4,484      | 3,587     | 1,576      | 1,119  |
| 24           | 225.6                         | 12.6            | 114.0       | 66.3          | 2,038.2                                   | 2,122       | 6,674      | 5,090     | 2,499      | 1,208  |
| 25           | 2,917.3                       | 183.7           | 1,103.0     | 1,691.0       | 23,113.6                                  | 2,419       | 7,676      | 6,984     | 2,555      | 557    |
| 26           | 1,018.3                       | 37.3            | 413.9       | 129.2         | 5,881.0                                   | 2,046       | 4,426      | 5,853     | 1,716      | -1,096 |
| 27           | 1,152.4                       | 4.7             | 575.4       | 256.4         | 14,358.1                                  | 1,640       | 4,500      | 5,747     | 2,031      | -1,639 |
| HRB          | 13,293.4                      | 1,173.3         | 6,117.9     | 4,674.0       | 93,706.4                                  | 2,133       | 7,064      | 6,293     | 2,328      | 576    |



### Part III Calculation of $NANI_p$ and $AN_p$

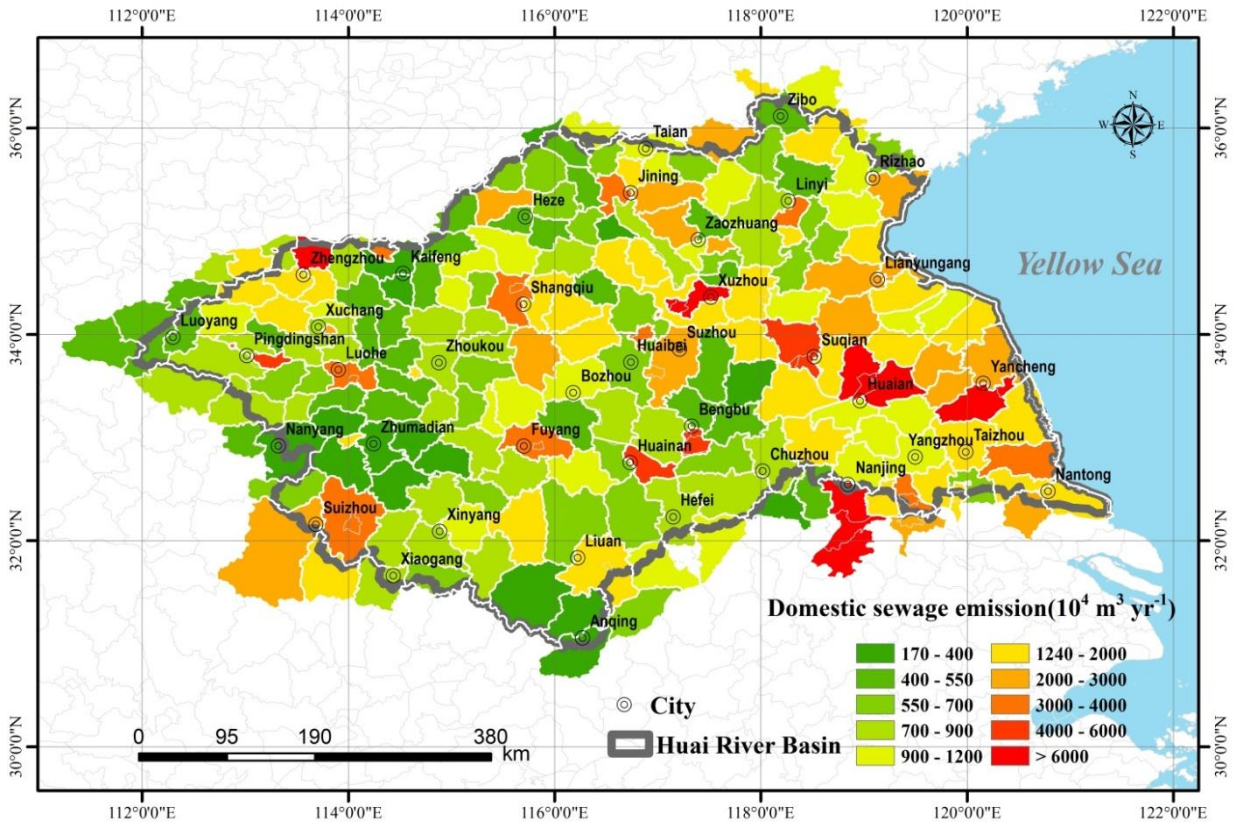

Fig. 2A Average amount of domestic sewage ( $W_{urban}$ ) for 2003-2010

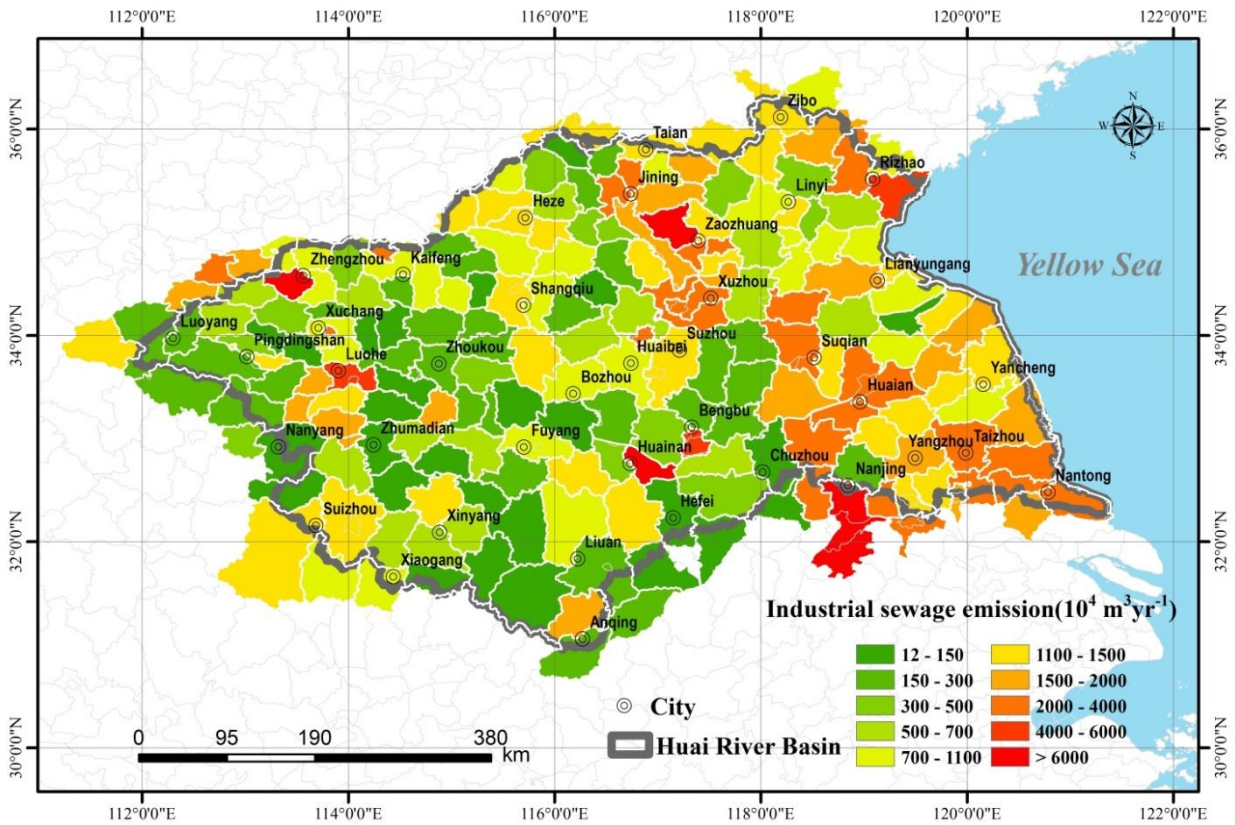

Fig. 3A Average amount of industrial sewage ( $W_{ind}$ ) for 2003-2010

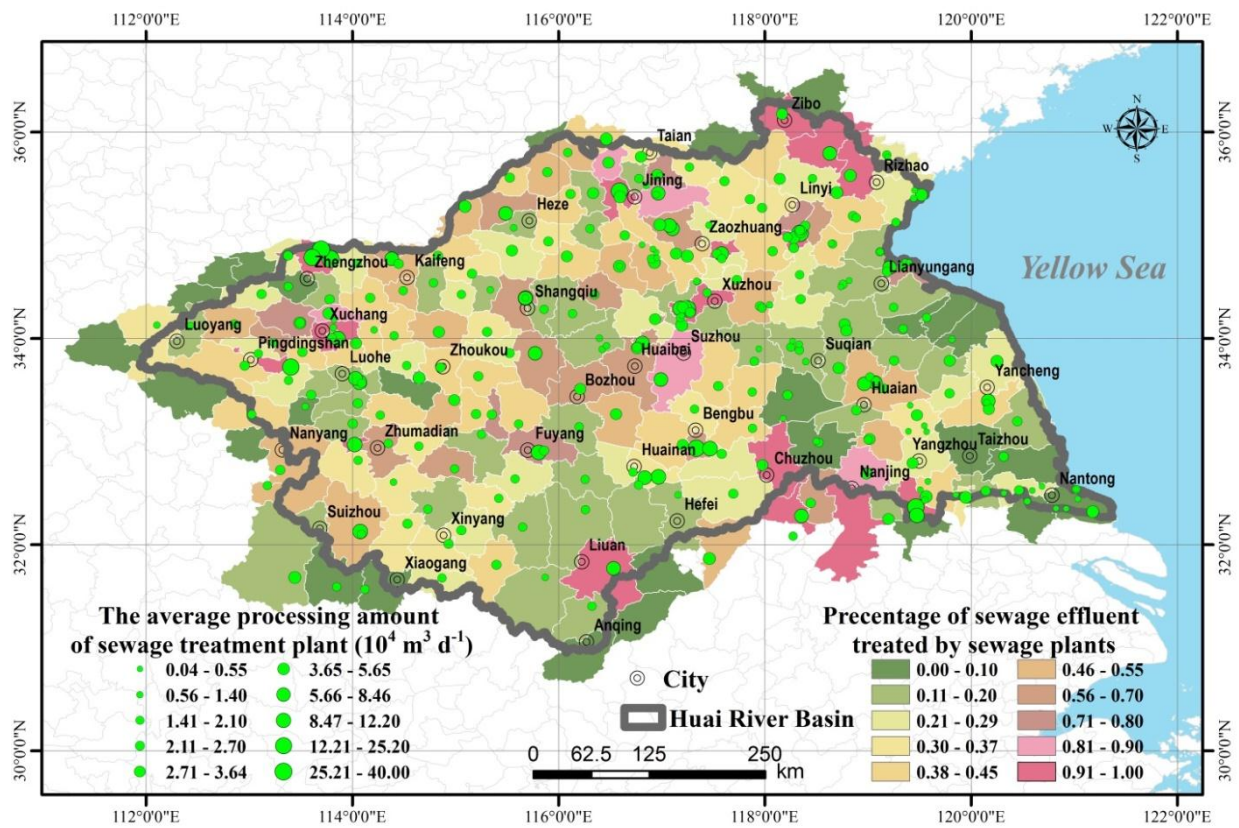

Fig. 4A Location and average daily processing amount of sewage treatment plants, and average percentage of sewage effluent treated by sewage plants ( $I_{sew}$ ) for each county (2003-2010)

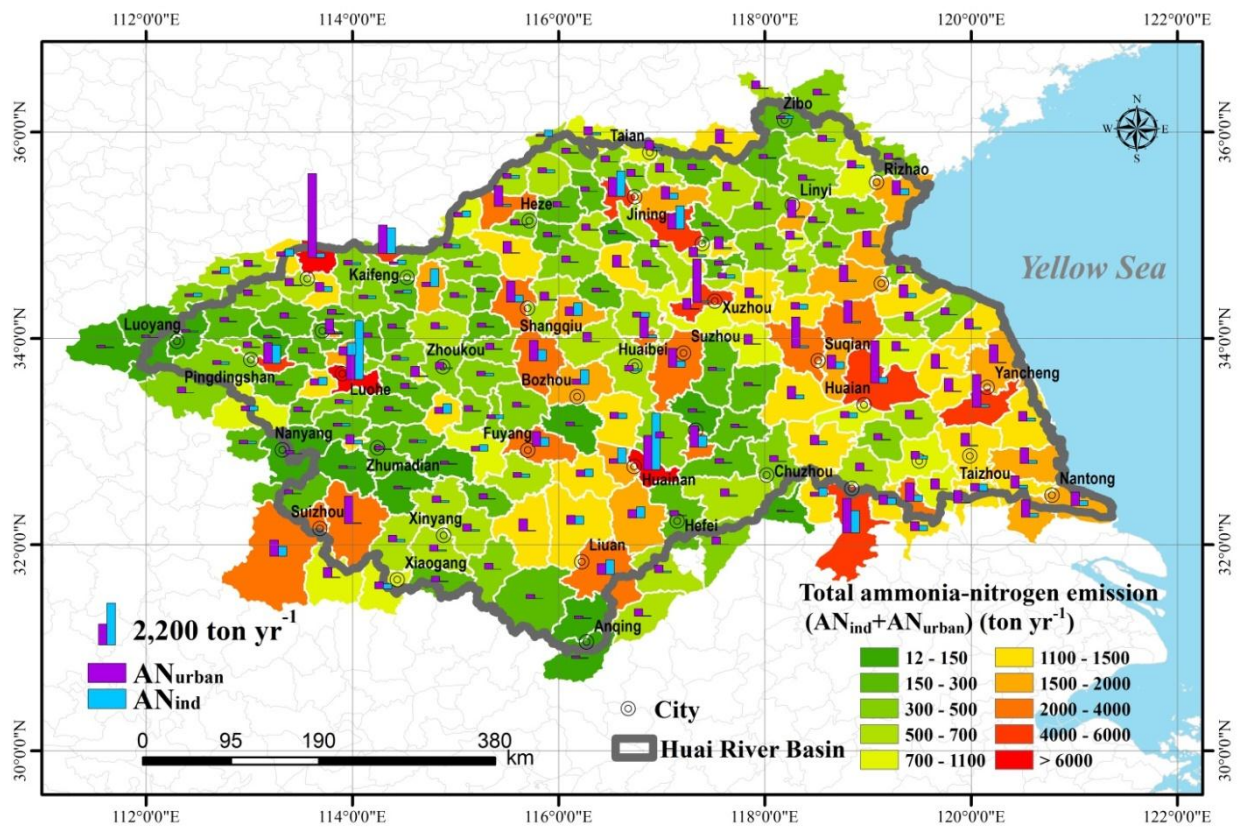

Fig. 5A Average ammonia-nitrogen emission from urban inhabitants ( $AN_{urban}$ ) and industrial production ( $AN_{ind}$ ) (2003-2010)

**Table 6A Data used to calculate point N input ( $NANI_p$ ) and point AN input ( $AN_p$ )**

| Watershed<br>ID | $AN_{urban}$<br>(ton N yr <sup>-1</sup> ) | $AN_{ind}$ | $W_{urban}+W_{ind}$<br>(10 <sup>4</sup> ton yr <sup>-1</sup> ) | $W_{sew}$    | $I_{sew}$ | $N_{urban}$ | $NANI_p$<br>(kg N km <sup>-2</sup> yr <sup>-1</sup> ) | $AN_p$ |
|-----------------|-------------------------------------------|------------|----------------------------------------------------------------|--------------|-----------|-------------|-------------------------------------------------------|--------|
| 1               | 362.24                                    | 64.26      | 1,189.14                                                       | 584.96       | 0.49      | 263.40      | 197.43                                                | 91.94  |
| 2               | 27.65                                     | 0.83       | 94.95                                                          | 29.21        | 0.31      | 178.57      | 149.48                                                | 20.41  |
| 3               | 150.97                                    | 66.56      | 563.93                                                         | 134.56       | 0.24      | 179.78      | 180.60                                                | 107.44 |
| 4               | 2,049.85                                  | 279.37     | 6,823.19                                                       | 3,158.34     | 0.46      | 280.75      | 231.65                                                | 161.16 |
| 5               | 3,299.00                                  | 467.57     | 11,434.59                                                      | 4,224.76     | 0.37      | 273.60      | 250.66                                                | 177.06 |
| 6               | 5,869.41                                  | 1,540.60   | 24,679.18                                                      | 9,619.19     | 0.39      | 324.14      | 309.89                                                | 178.41 |
| 7               | 1,970.07                                  | 1,019.15   | 11,426.74                                                      | 4,907.35     | 0.43      | 395.67      | 395.46                                                | 181.25 |
| 8               | 110.00                                    | 60.39      | 778.10                                                         | 226.62       | 0.29      | 210.21      | 229.81                                                | 70.86  |
| 9               | 420.56                                    | 259.38     | 3,149.93                                                       | 273.71       | 0.09      | 530.83      | 878.17                                                | 488.33 |
| 10              | 3,901.65                                  | 3,345.51   | 20,407.51                                                      | 10,625.20    | 0.52      | 614.06      | 504.27                                                | 332.15 |
| 11              | 370.62                                    | 11.73      | 2,231.26                                                       | 1,057.33     | 0.47      | 422.59      | 351.74                                                | 145.73 |
| 12              | 13,132.41                                 | 5,293.61   | 68,187.22                                                      | 42,860.24    | 0.63      | 956.84      | 706.80                                                | 351.27 |
| 13              | 24,056.06                                 | 10,399.76  | 113,653.30                                                     | 60,539.21    | 0.53      | 564.00      | 455.65                                                | 240.97 |
| 14              | 735.05                                    | 36.50      | 1,774.94                                                       | 450.29       | 0.25      | 171.11      | 149.88                                                | 112.81 |
| 15              | 164.14                                    | 50.44      | 1,548.65                                                       | 286.67       | 0.19      | 81.36       | 138.32                                                | 42.95  |
| 16              | 34,528.05                                 | 20,577.97  | 164,877.10                                                     | 84,093.14    | 0.51      | 602.19      | 499.81                                                | 290.86 |
| 17              | 34,867.50                                 | 20,657.61  | 166,707.40                                                     | 84,935.32    | 0.51      | 598.24      | 497.10                                                | 288.41 |
| 18              | 3,705.10                                  | 2,121.96   | 16,058.43                                                      | 6,538.91     | 0.41      | 410.31      | 363.85                                                | 245.34 |
| 19              | 2,846.29                                  | 610.32     | 12,290.67                                                      | 7,057.34     | 0.57      | 916.81      | 702.72                                                | 290.09 |
| 20              | 44,368.83                                 | 23,964.77  | 206,656.30                                                     | 101,228.53   | 0.49      | 569.88      | 481.20                                                | 279.84 |
| 21              | 1,200.26                                  | 823.23     | 6,011.01                                                       | 5,532.19     | 0.92      | 642.95      | 406.02                                                | 279.35 |
| 22              | 11,205.82                                 | 5,574.58   | 59,570.72                                                      | 33,242.62    | 0.56      | 652.39      | 592.09                                                | 322.49 |
| 23              | 2,563.46                                  | 446.02     | 12,691.19                                                      | 5,650.17     | 0.45      | 433.62      | 392.99                                                | 196.06 |
| 24              | 924.25                                    | 208.80     | 5,539.77                                                       | 4,077.34     | 0.74      | 434.01      | 328.14                                                | 119.81 |
| 25              | 18,749.71                                 | 6,718.70   | 98,063.07                                                      | 60,801.57    | 0.62      | 692.92      | 568.89                                                | 277.08 |
| 26              | 8,829.86                                  | 1,781.42   | 40,598.21                                                      | 10,020.94    | 0.25      | 633.71      | 688.58                                                | 408.91 |
| 27              | 12,724.73                                 | 2,332.38   | 64,654.06                                                      | 22,203.02    | 0.34      | 728.70      | 745.67                                                | 377.33 |
| HRB             | 85,597.36                                 | 35,006.07  | 4,155,114.03                                                   | 1,983,314.10 | 0.48      | 614.37      | 542.12                                                | 300.17 |

## Part IV Nitrogen budget

**Table 7A Nitrogen budgets for 27 watersheds of the Huai River basin**

| ID  | Point N ( $NANI_p$ ) | Non-point N ( $NANI_n$ ) | Total N ( $NANI$ ) | Riverine AN flux | Streamflow | Flow-weighted                             |
|-----|----------------------|--------------------------|--------------------|------------------|------------|-------------------------------------------|
|     |                      |                          |                    |                  |            | AN concentration                          |
|     |                      |                          |                    |                  |            | ( $\text{kg N km}^{-2} \text{ yr}^{-1}$ ) |
|     |                      |                          |                    |                  |            | (mm)                                      |
|     |                      |                          |                    |                  |            | ( $\text{mg L}^{-1}$ )                    |
| 1   | 197                  | 12,366                   | 12,563             | 191              | 383        | 0.50                                      |
| 2   | 149                  | 4,927                    | 5,076              | 116              | 437        | 0.27                                      |
| 3   | 181                  | 8,839                    | 9,020              | 188              | 504        | 0.37                                      |
| 4   | 232                  | 13,172                   | 13,403             | 267              | 420        | 0.64                                      |
| 5   | 251                  | 15,843                   | 16,093             | 163              | 412        | 0.40                                      |
| 6   | 310                  | 22,665                   | 22,975             | 219              | 377        | 0.58                                      |
| 7   | 395                  | 30,125                   | 30,520             | 236              | 325        | 0.73                                      |
| 8   | 230                  | 25,640                   | 25,870             | 254              | 278        | 0.91                                      |
| 9   | 878                  | 37,905                   | 38,783             | 656              | 280        | 2.35                                      |
| 10  | 504                  | 29,325                   | 29,829             | 373              | 246        | 1.52                                      |
| 11  | 352                  | 19,864                   | 20,216             |                  |            |                                           |
| 12  | 707                  | 32,375                   | 33,081             | 337              | 140        | 2.41                                      |
| 13  | 456                  | 24,743                   | 25,199             | 257              | 288        | 0.89                                      |
| 14  | 150                  | 11,245                   | 11,395             | 147              | 393        | 0.37                                      |
| 15  | 138                  | 3,788                    | 3,926              | 141              | 784        | 0.18                                      |
| 16  | 500                  | 25,747                   | 26,246             | 185              | 275        | 0.67                                      |
| 17  | 497                  | 25,647                   | 26,144             | 255              | 286        | 0.89                                      |
| 18  | 364                  | 26,803                   | 27,167             |                  |            |                                           |
| 19  | 703                  | 26,284                   | 26,986             | 272              | 125        | 2.17                                      |
| 20  | 481                  | 25,147                   | 25,628             |                  |            |                                           |
| 21  | 406                  | 34,517                   | 34,923             | 367              | 109        | 3.37                                      |
| 22  | 592                  | 35,722                   | 36,314             |                  |            |                                           |
| 23  | 393                  | 14,931                   | 15,324             | 193              | 173        | 1.11                                      |
| 24  | 328                  | 21,852                   | 22,181             | 201              | 254        | 0.79                                      |
| 25  | 569                  | 31,288                   | 31,857             |                  |            |                                           |
| 26  | 689                  | 28,145                   | 28,833             |                  |            |                                           |
| 27  | 746                  | 25,902                   | 26,648             |                  |            |                                           |
| HRB | 542                  | 26,644                   | 27,186             |                  |            |                                           |

## Part V Relationship between ammonia-nitrogen and total nitrogen

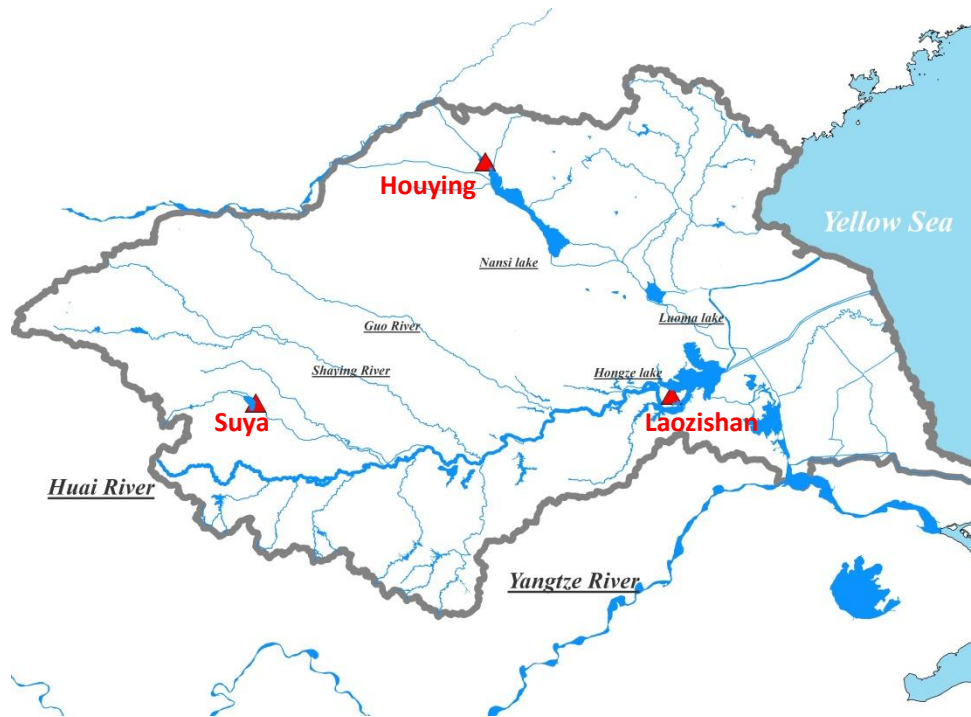

Fig. 6A Location of monitoring stations used to determine the proportional relationship between AN and total N

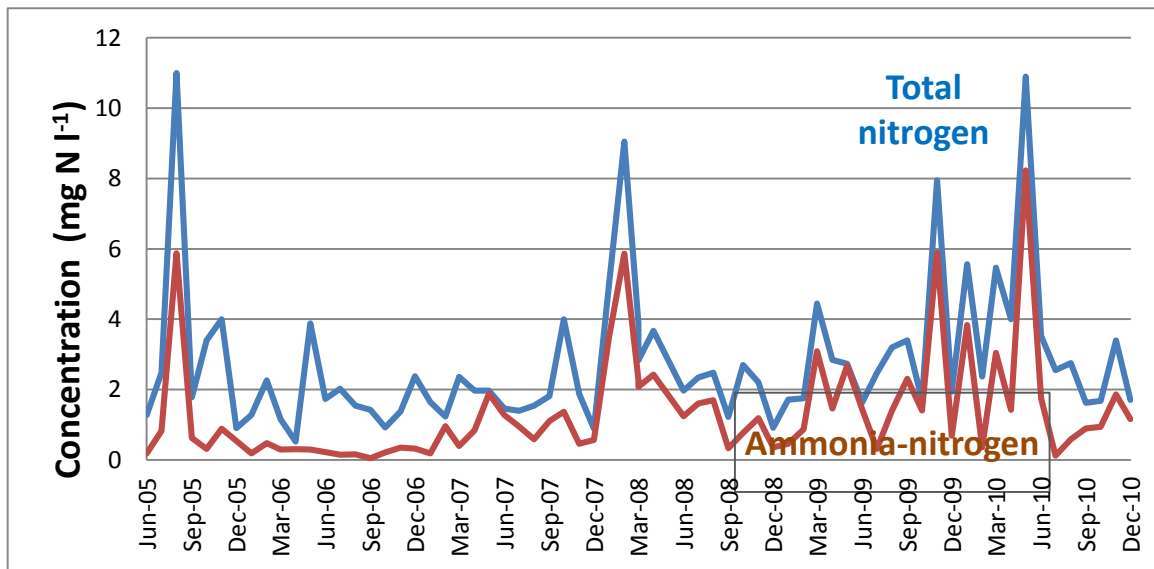

Fig. 7A Monthly variation of ammonia-nitrogen and total nitrogen concentrations at Suya station (Jun 2005 to DEC 2010). Ammonia-nitrogen concentration is well correlated with total nitrogen ( $AN=0.56*TN$ ,  $R^2=0.78$ ,  $P<0.001$ ,  $N=67$ )

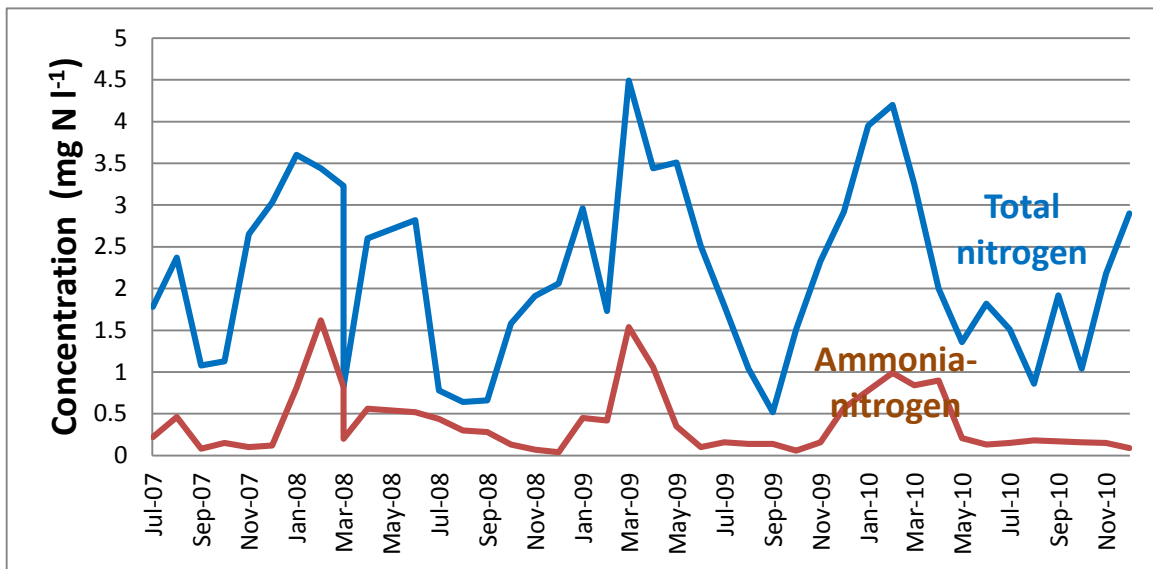

**Fig.8A** Monthly variation of ammonia-nitrogen and total nitrogen concentrations at Laozishan station (Jun 2007 to DEC 2010). Ammonia-nitrogen concentration is well correlated with total nitrogen ( $AN=0.20*TN$ ,  $R^2=0.43$ ,  $P<0.001$ ,  $N=42$ )

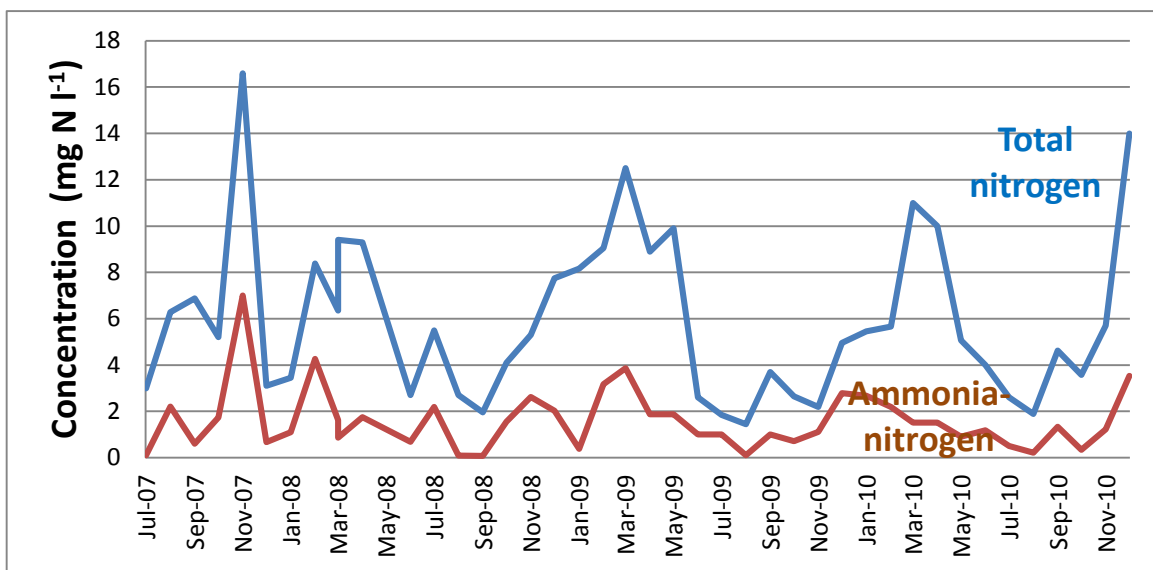

**Fig.9A** Monthly variation of ammonia-nitrogen and total nitrogen concentrations at Houying station (Jun 2007 to DEC 2010). Ammonia-nitrogen concentration is well correlated with total nitrogen ( $AN=0.23*TN$ ,  $R^2=0.60$ ,  $P<0.001$ ,  $N=42$ )
